# Supplementary material
Source: PubMed Central journal article supplement (PMC4929028)

Proband  
(forward)

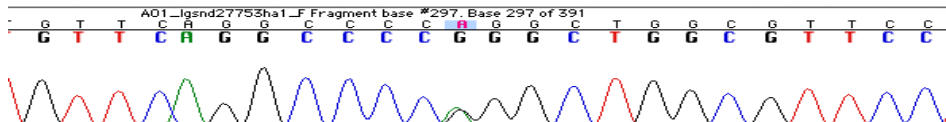

Proband  
(reverse)

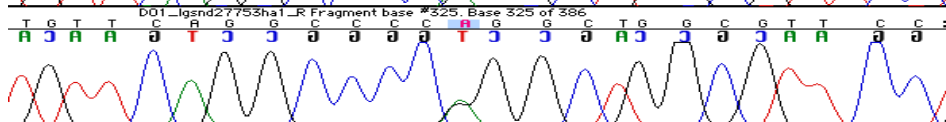

Mother  
(forward)

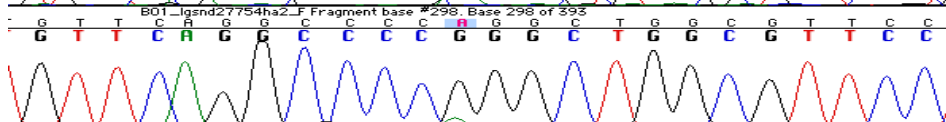

Mother  
(reverse)

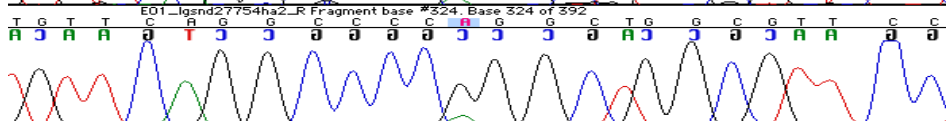

Father  
(forward)

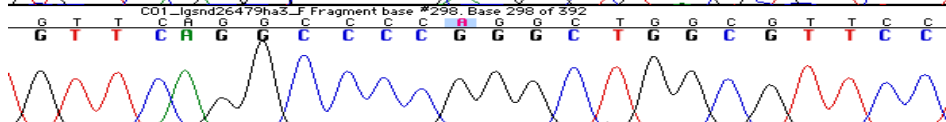

Father  
(reverse)

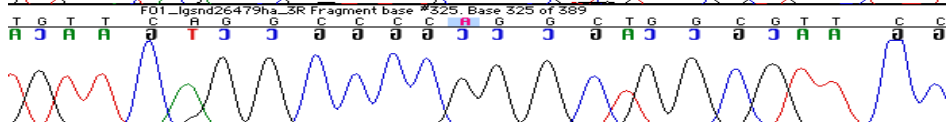

Supplement: NIHMS766156-supplement-a.pdf [file NIHMS766156-supplement-a.pdf]
