# Supplementary material
Source: PubMed Central journal article supplement (PMC4929028)

# Forward

# Reverse

Proband  
(SUDC)

Father

Mother

Sibling  
(healthy)

Sibling  
(Dravet)

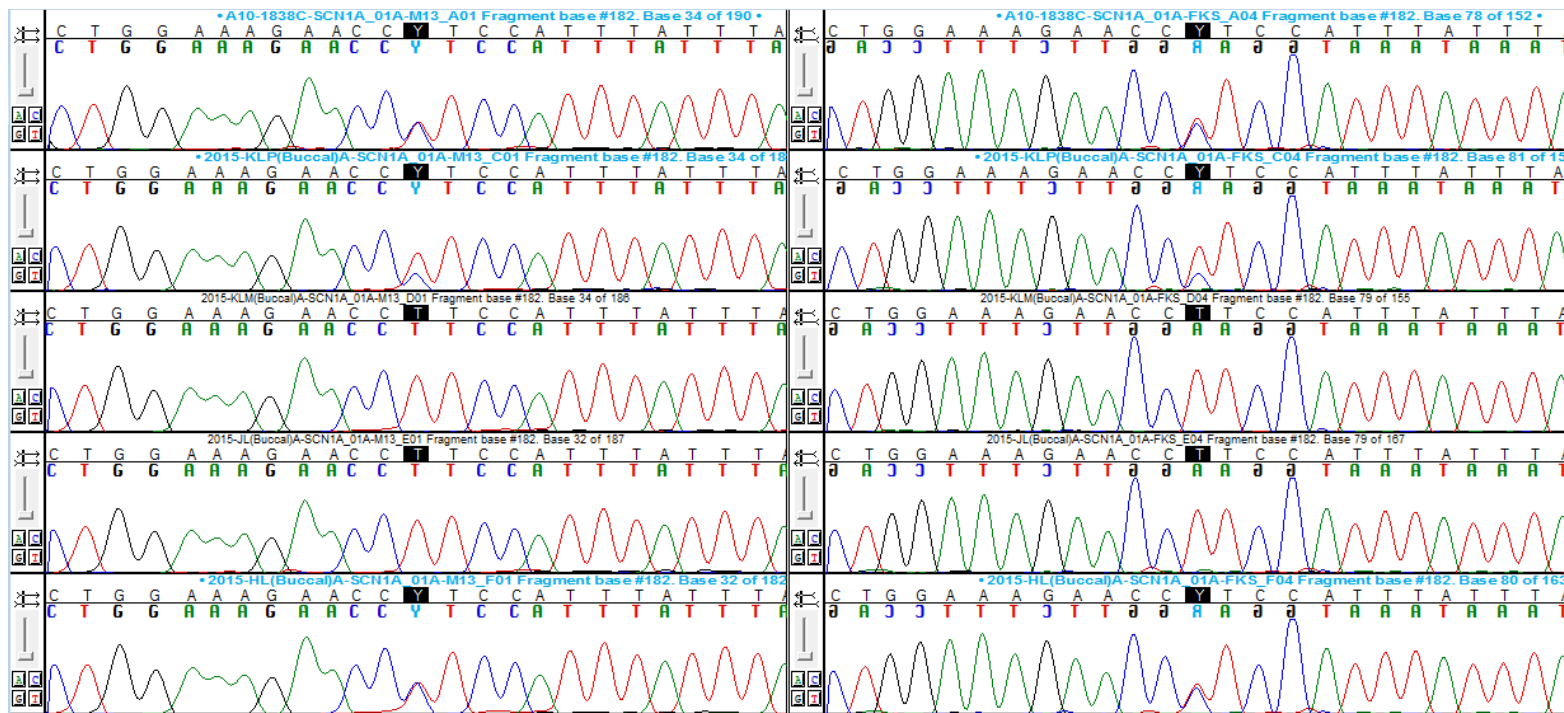

Supplement: NIHMS766156-supplement.pdf [file NIHMS766156-supplement.pdf]
